# Supplementary material for: Influence of Temperature on Seed Germination of Five Wild-Growing Tulipa Species of Greece Associated with Their Ecological Profiles: Implications for Conservation and Cultivation
Source: MDPI journal article supplement (doi:10.3390/plants12071574), 2023-04-06
Supplement: s1 [file s1]

**Supplementary Material Table S1.** ANOVA results concerning the effect of temperature on germination of *Tulipa australis* seeds.

| Source       | Sum of Squares | df | Mean Square | F      | Sig.  |
|--------------|----------------|----|-------------|--------|-------|
| Temperatures | 13531.67       | 4  | 3382.92     | 249.65 | 0.000 |
| Error        | 203.26         | 15 | 13.55       |        |       |
