# Supplementary material for: Influence of Temperature on Seed Germination of Five Wild-Growing Tulipa Species of Greece Associated with Their Ecological Profiles: Implications for Conservation and Cultivation
Source: MDPI journal article supplement (doi:10.3390/plants12071574), 2023-04-06
Supplement: s1 [file s1]

**Supplementary Material Table S6.** Analysis of Variance (ANOVA) among the five studied Greek tulip species regarding weight, length and width of bulblets produced from seeds after the first growing period.

| Source | Sum of Squares | df | Mean Square | F    | Sig.  |
|--------|----------------|----|-------------|------|-------|
| Weight | 1804.59        | 4  | 451.15      | 5.47 | 0.001 |
| Error  | 4951.19        | 60 | 82.52       |      |       |
| Length | 0.22           | 4  | 0.054       | 5.49 | 0.001 |
| Error  | 0.60           | 60 | 0.010       |      |       |
| Width  | 0.07           | 4  | 0.018       | 4.52 | 0.003 |
| Error  | 0.24           | 60 | 0.004       |      |       |
