# Supplementary material for: Influence of Temperature on Seed Germination of Five Wild-Growing Tulipa Species of Greece Associated with Their Ecological Profiles: Implications for Conservation and Cultivation
Source: MDPI journal article supplement (doi:10.3390/plants12071574), 2023-04-06
Supplement: s1 [file s1]

**Supplementary Material Table S5.** ANOVA results concerning the effect of temperature on germination of *Tulipa undulatifolia* seeds.

| Source       | Sum of<br>Squares | df | Mean<br>Square | F      | Sig.  |
|--------------|-------------------|----|----------------|--------|-------|
| Temperatures | 14952.02          | 4  | 3738.01        | 160.29 | 0.000 |
| Error        | 349.79            | 15 | 23.32          |        |       |
