# Supplementary material for: Influence of Temperature on Seed Germination of Five Wild-Growing Tulipa Species of Greece Associated with Their Ecological Profiles: Implications for Conservation and Cultivation
Source: MDPI journal article supplement (doi:10.3390/plants12071574), 2023-04-06
Supplement: s1 [file s1]

**Supplementary Material Table S4.** ANOVA results concerning the effect of temperature on germination of *Tulipa goulimyi* seeds.

| Source       | Sum of Squares | df | Mean Square | F      | Sig.  |
|--------------|----------------|----|-------------|--------|-------|
| Temperatures | 15443.99       | 4  | 3860.99     | 238.69 | 0.000 |
| Error        | 242.64         | 15 | 16.18       |        |       |
