# Supplementary material for: Influence of Temperature on Seed Germination of Five Wild-Growing Tulipa Species of Greece Associated with Their Ecological Profiles: Implications for Conservation and Cultivation
Source: Plants (Basel). 2023 Apr 6;12(7):1574. doi: 10.3390/plants12071574 (PMC10096705; doi:10.3390/plants12071574)
Supplement: Supplementary file 1 [file plants-12-01574-s001.zip]

Archive with 7 entries (7 files):
- plants-2295215-Supplementary material Table S1.pdf
- plants-2295215-Supplementary material Table S2.pdf
- plants-2295215-Supplementary material Table S3.pdf
- plants-2295215-Supplementary material Table S4.pdf
- plants-2295215-Supplementary material Table S5.pdf
- plants-2295215-Supplementary material Table S6.pdf
- plants-2295215-Supplementary material Table S7.xlsx
