# Supplementary material for: Influence of Temperature on Seed Germination of Five Wild-Growing Tulipa Species of Greece Associated with Their Ecological Profiles: Implications for Conservation and Cultivation
Source: Plants (Basel). 2023 Apr 6;12(7):1574. doi: 10.3390/plants12071574 (PMC10096705; doi:10.3390/plants12071574)
Supplement: Supplementary file 1 [file plants-12-01574-s001.zip › plants-2295215-Supplementary material Table S7.xlsx]

## Sheet: Sypplementary Table S7 Legend
Table S7. Spatial (geo-referenced) information of herbarium specimens of Tulipa australis, T. bakeri, T. clusiana, T. goulimyi and T. undulatifolia from Lund Virtual Herbarium (http://herbarium.emg.umu.se/, accessed 31 March 2023), GBIF (https://www.gbif.org/, accessed 31 March 2023), JAQC herbaria (https://www.jacq.org/, accessed 31 March 2023), the Balkan Botanic Garden of Kroussia's database a…

## Sheet: Table S7
ID	Genus	Species	Longtitude	Latitude
1	Tulipa	australis	22.1901	38.0145
2	Tulipa	australis	21.6667	40.1833
3	Tulipa	australis	21.1167	40.1
4	Tulipa	australis	45.1842	51.6867
5	Tulipa	australis	45.1844	52.1084
6	Tulipa	australis	23.5894	40.5061
7	Tulipa	australis	23.0503	36.5967
8	Tulipa	australis	22.5247	38.4347
9	Tulipa	australis	22.5917	37.3331
10	Tulipa	australis	22.6714	37.3681
11	Tulipa	australis	22.0306	39.1867
12	Tulipa	australis	22.2231	37.6122
13	Tulipa	australis	22.1731	37.9958
14	Tulipa	australis	21	40.0472
15	Tulipa	australis	22.0925	40.1953
16	Tulipa	australis	21.0703	40.0472
17	Tulipa	australis	21.9306	38.6378
18	Tulipa	australis	20.9069	40.085
19	Tulipa	australis	22.1356	37.78
20	Tulipa	australis	22.3594	37.6064
21	Tulipa	australis	22.0261	38.0783
22	Tulipa	australis	22.9167	36.9667
23	Tulipa	australis	25.5	37.0833
24	Tulipa	australis	24.6667	40.7333
25	Tulipa	australis	21.2167	39.7833
26	Tulipa	australis	21.2	39.7833
27	Tulipa	australis	22.0333	40.6333
28	Tulipa	australis	21.1167	40.1
29	Tulipa	australis	21.25	40.8167
30	Tulipa	australis	23.8167	37.9333
31	Tulipa	australis	23.7833	38.1
32	Tulipa	australis	23.7833	38.1667
33	Tulipa	australis	22.1833	38
34	Tulipa	australis	22.11	38
35	Tulipa	australis	21.18	39.12
36	Tulipa	australis	22.1922	38.0136
37	Tulipa	australis	22.0101	40.5259
38	Tulipa	australis	22.0783	40.8486
39	Tulipa	australis	24.7094	40.7147
40	Tulipa	australis	20.9044	40.0939
41	Tulipa	australis	21.1408	40.1103
42	Tulipa	australis	22.4128	38.0203
43	Tulipa	australis	22.4522	36.8536
44	Tulipa	australis	21.5072	40.4694
45	Tulipa	australis	22.2561	37.5733
46	Tulipa	australis	21.5106	40.0114
47	Tulipa	australis	22.75	37.0333
48	Tulipa	australis	22.4167	37.9667
49	Tulipa	australis	24.7501	41.1177
50	Tulipa	australis	22.1903	38.0157
51	Tulipa	australis	22.1983	38.0147
52	Tulipa	australis	23.8022	37.9078
53	Tulipa	australis	23.9412	37.8094
54	Tulipa	australis	23.7979	37.9272
55	Tulipa	australis	23.7225	38.149
56	Tulipa	australis	21.1146	40.0966
57	Tulipa	australis	21.9591	40.6132
58	Tulipa	australis	21.5106	40.0114
59	Tulipa	australis	21.5072	40.4694
60	Tulipa	australis	21.1408	40.1103
61	Tulipa	australis	21.0703	40.0472
62	Tulipa	australis	21.1167	40.1
63	Tulipa	australis	21	40.0472
64	Tulipa	australis	21.1146	40.0966
65	Tulipa	australis	21.1146	40.0966
66	Tulipa	australis	22.4201	37.3084
67	Tulipa	australis	21.2	40.8167
68	Tulipa	australis	21.25	40.8167
69	Tulipa	australis	23.8156	37.947
70	Tulipa	australis	23.7253	38.1463
71	Tulipa	australis	22.4942	37.9753
72	Tulipa	bakeri	23.9048	35.3366
73	Tulipa	bakeri	23.9048	35.3365
74	Tulipa	bakeri	23.9	35.3333
75	Tulipa	bakeri	23.9049	35.3367
76	Tulipa	bakeri	23.9	35.3333
77	Tulipa	bakeri	23.9047	35.3367
78	Tulipa	bakeri	23.9125	35.3225
79	Tulipa	bakeri	23.9048	35.3366
80	Tulipa	bakeri	23.8982	35.3301
81	Tulipa	bakeri	23.9093	35.3325
82	Tulipa	bakeri	23.897	35.3308
83	Tulipa	clusiana	26.0563	38.3052
84	Tulipa	clusiana	26.0982	38.3377
85	Tulipa	goulimyi	23.0242	36.8322
86	Tulipa	goulimyi	22.9408	36.8219
87	Tulipa	goulimyi	22.9033	37.0733
88	Tulipa	goulimyi	22.985	36.6069
89	Tulipa	goulimyi	23.1	36.5333
90	Tulipa	goulimyi	22.8167	36.8667
91	Tulipa	goulimyi	22.9833	36.6333
92	Tulipa	goulimyi	22.5	37.03
93	Tulipa	goulimyi	22.52	37.02
94	Tulipa	goulimyi	22.52	37.03
95	Tulipa	goulimyi	22.52	37.05
96	Tulipa	goulimyi	22.53	37.04
97	Tulipa	goulimyi	22.5	37.01
98	Tulipa	goulimyi	22.9475	36.829
99	Tulipa	goulimyi	22.9479	36.8292
100	Tulipa	goulimyi	22.9671	36.2576
101	Tulipa	goulimyi	22.9665	36.1677
102	Tulipa	goulimyi	22.9685	36.2519
103	Tulipa	goulimyi	22.9475	36.8283
104	Tulipa	goulimyi	22.9677	36.2531
105	Tulipa	goulimyi	22.966	36.168
106	Tulipa	goulimyi	22.9477	36.829
107	Tulipa	goulimyi	22.9667	36.2333
108	Tulipa	goulimyi	23.7529	35.5032
109	Tulipa	goulimyi	22.9167	36.95
110	Tulipa	undulatifolia	23.173	37.4526
111	Tulipa	undulatifolia	22.0667	39.1667
112	Tulipa	undulatifolia	23.1667	37.4
113	Tulipa	undulatifolia	22.6219	37.3175
114	Tulipa	undulatifolia	23.3167	38.3167
115	Tulipa	undulatifolia	23.1667	37.45
116	Tulipa	undulatifolia	23.23	38.09
117	Tulipa	undulatifolia	26.0157	38.1838
118	Tulipa	undulatifolia	22.74	36.8521
119	Tulipa	undulatifolia	23.029	36.7057
120	Tulipa	undulatifolia	26.235	39.0433
121	Tulipa	undulatifolia	23.7366	38.1521
122	Tulipa	undulatifolia	23.1725	37.4527
123	Tulipa	undulatifolia	22.4275	37.9808
124	Tulipa	undulatifolia	23.1773	37.4504
125	Tulipa	undulatifolia	23.1723	37.4523
126	Tulipa	undulatifolia	26.2265	39.0469
127	Tulipa	undulatifolia	26.2267	39.0465
128	Tulipa	undulatifolia	23.1797	37.4531
129	Tulipa	undulatifolia	23.8705	38.1632
130	Tulipa	undulatifolia	26.0157	38.1838
131	Tulipa	undulatifolia	26.2265	39.0469
132	Tulipa	undulatifolia	26.2267	39.0465
133	Tulipa	undulatifolia	26.235	39.0433
